# Supplementary material for: A carbon network strategy to synthesize silicon–carbon anodes toward regulated morphologies during molten salt reduction
Source: Royal Society of Chemistry journal article supplement (doi:10.1039/d0ce00751j), 2020-01-01
Supplement: d0ce00751j1.pdf [file d0ce00751j1.pdf]

## **Electronic Supplementary Information**

### **A Carbon Network Strategy to Synthesize Silicon-carbon Anodes toward Regulated Morphologies during Molten Salt Reduction**

Guanjia Zhu,<sup>a</sup> Miaomiao Jiang,<sup>a</sup> Yuanyuan Ma,<sup>a</sup> Wei Luo,<sup>a</sup> Lianjun Wang,<sup>a</sup> Wan  
Jiang<sup>a,b</sup> and Jianping Yang<sup>\*a,b</sup>

<sup>a</sup> State Key Laboratory for Modification of Chemical Fibers and Polymer Materials,  
College of Materials Science and Engineering, Donghua University, Shanghai  
201620, P. R. China

<sup>b</sup> Institute of Functional Materials, Donghua University, Shanghai 201620, China.

Corresponding Author

\*E-mail: [jianpingyang@dhu.edu.cn](mailto:jianpingyang@dhu.edu.cn)

#### **Author Contributions**

The manuscript was written through contributions of all authors. All authors have given approval to the final version of the manuscript.

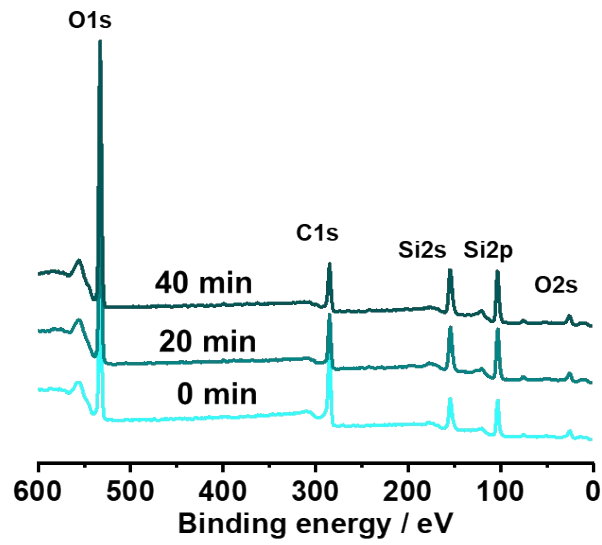

**Fig. S1** XPS survey scan of TB-Al surface and after etching at 20 min intervals with Ar-ions sputtering at 1 keV.

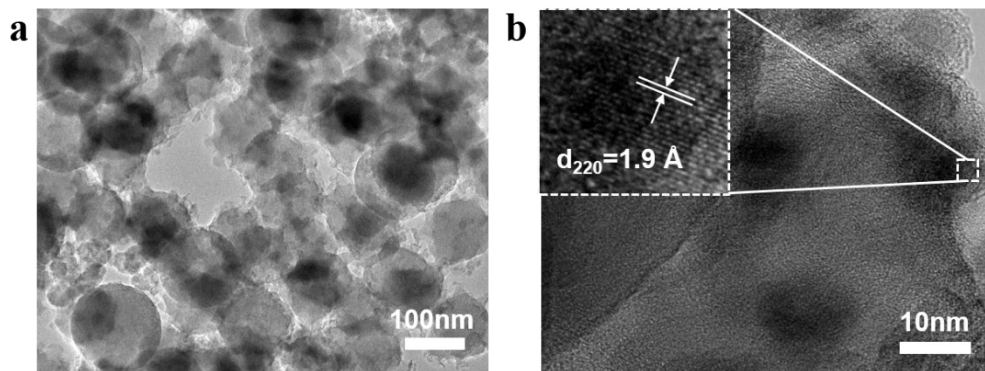

**Fig. S2** (a) TEM and (b) HRTEM images of the B-Al sample which is the reduction product of B-800 prepared by using BTEB as the precursor.

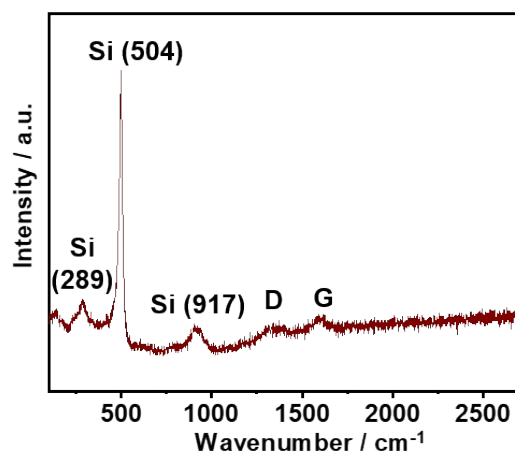

**Fig. S3** Raman spectrum of the B-Al sample which is the reduction product of B-800 prepared by using BTEB as the precursor.

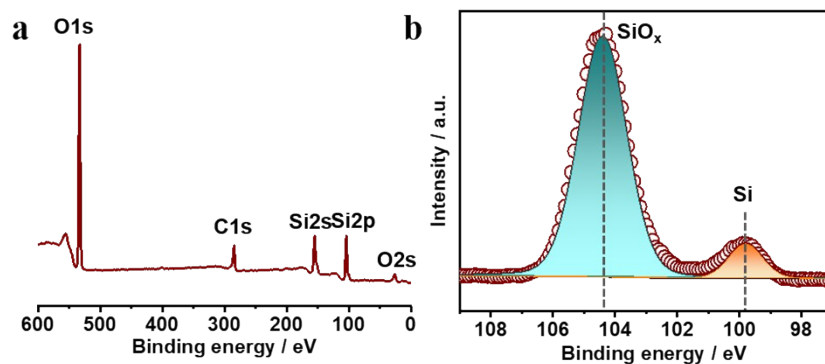

**Fig. S4** (a) XPS survey scan and (b) Si 2p high resolution XPS spectrum of the B-Al sample which is the reduction product of B-800 prepared by using BTEB as the precursor.

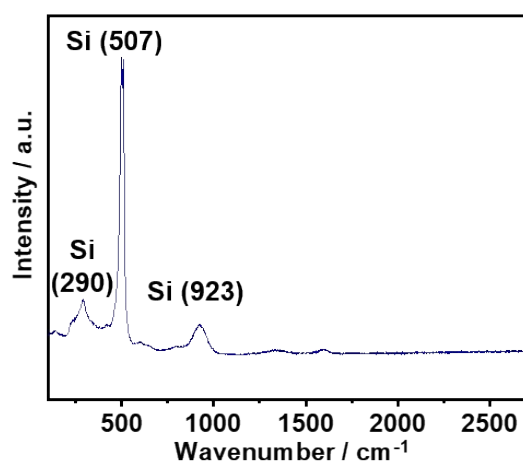

**Fig. S5** Raman spectrum of the T-Al which is the reduction product of T-800 prepared by using TEOS as the precursor.

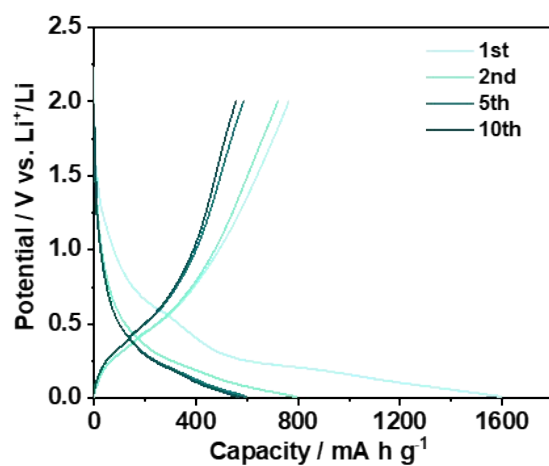

**Fig. S6** Voltage profiles of the TB-Al electrode at a current density of 0.5 A g<sup>-1</sup>.

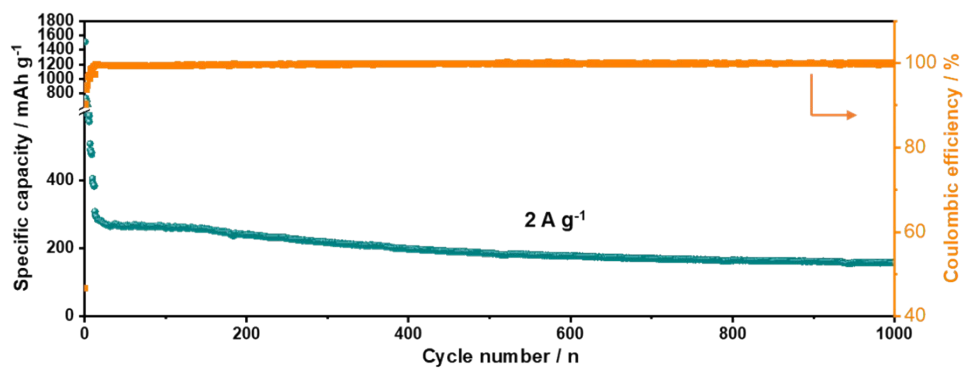

**Fig. S7** Cycling performance of the TB-Al electrode at a large current density of 2 A g<sup>-1</sup>.
